# Supplementary material
Source: publisher figshare collection journal article supplement (https://tandf.figshare.com/ndownloader/files/20178572)
Supplement: Supplementary file 1 [file 20178572]

Synthesis of Multifunctional Copolymers of Poly(methylphenylsilane) with (R)-N-(1-phenylethyl)methacrylamide, Disperse Red 1 Methacrylate and Their Optical and Photoluminescence Properties

Km. Meenu1, Dibyendu S. Bag2, Rekha Lagarkha3, Radha Tomar4 and, Arvind Kumar Gupta5

1, 2Defence Material and Stores Research and Development Establishment (DMSRDE) P. O., G. T. Road, Kanpur-208013, INDIA

3Department of Chemistry Bundelkhand University Jhansi-284128, INDIA

4SOS in Chemistry, Jiwaji University, Gwalior-474011, INDIA

5Defence Research and Development Establishment (DRDE), Gwalior-474001, INDIA

Email: [singhmeenu458@gmail.com](mailto:singhmeenu458@gmail.com)

**Supplemental Materials**

**
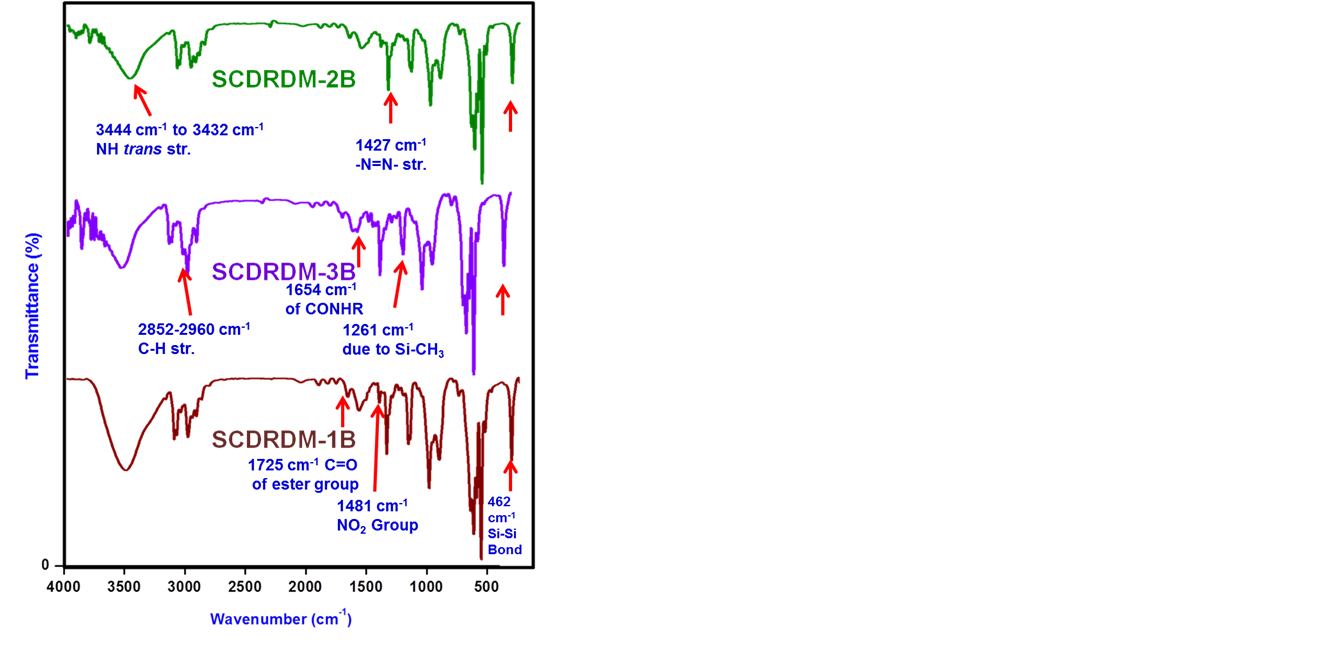
**

# Figure 1: FTIR spectra of multifunctional chiral and photoactive polysilane copolymers

***
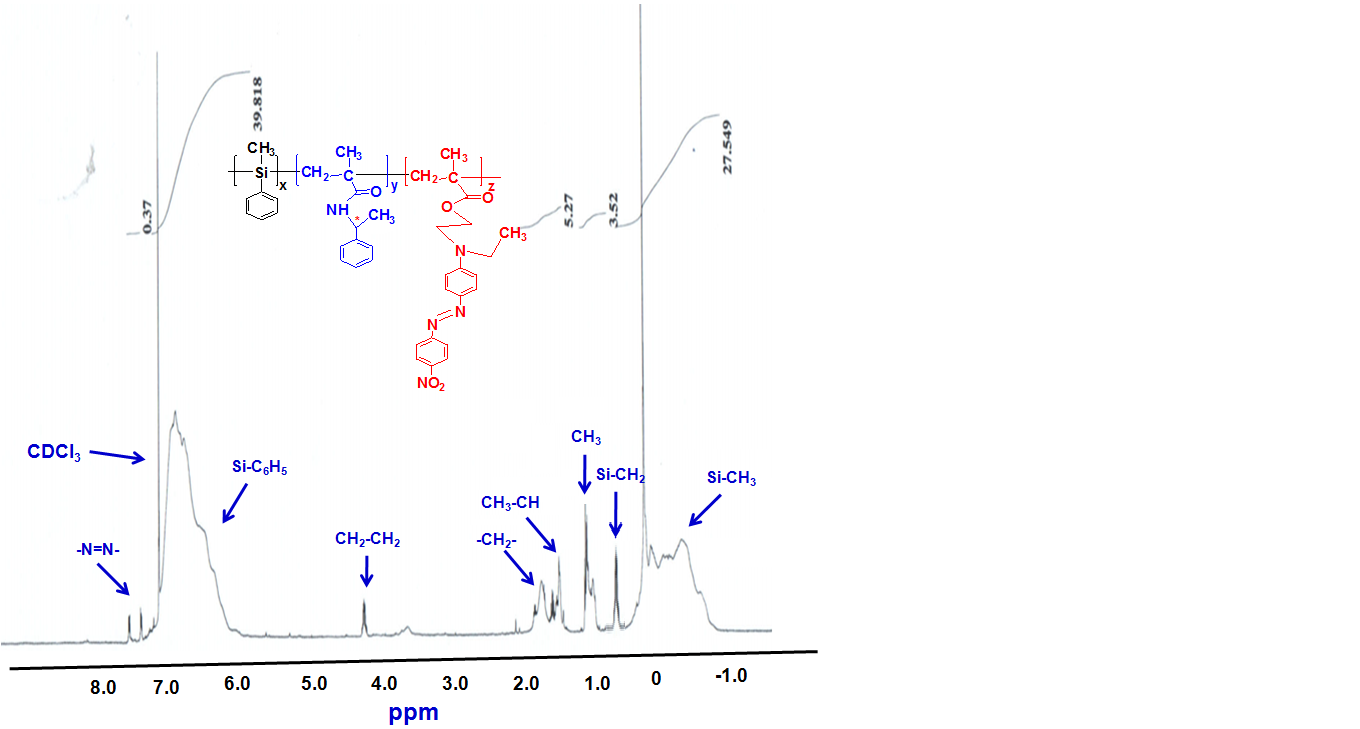
***

**Figure 2**: NMR analysis of multifunctional polysilane (SCDRDM-2B)

***
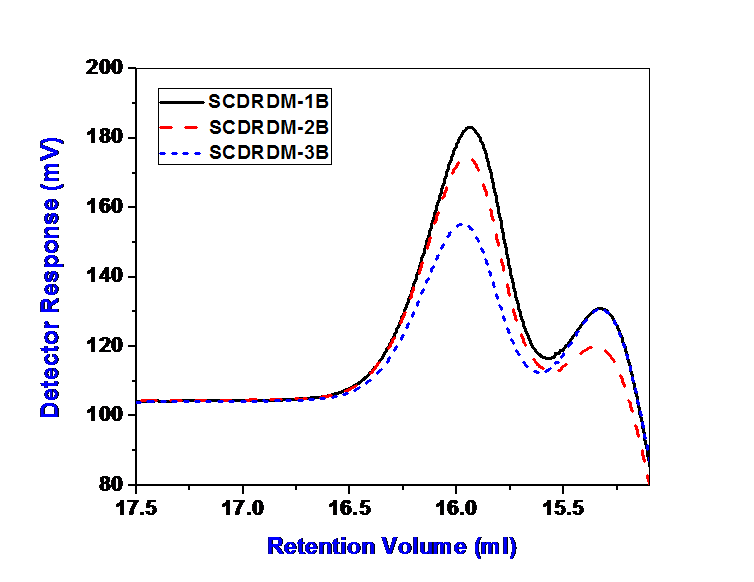
***

# Figure S 3: Combined GPC chromatograms of SCDRDM copolymers

**
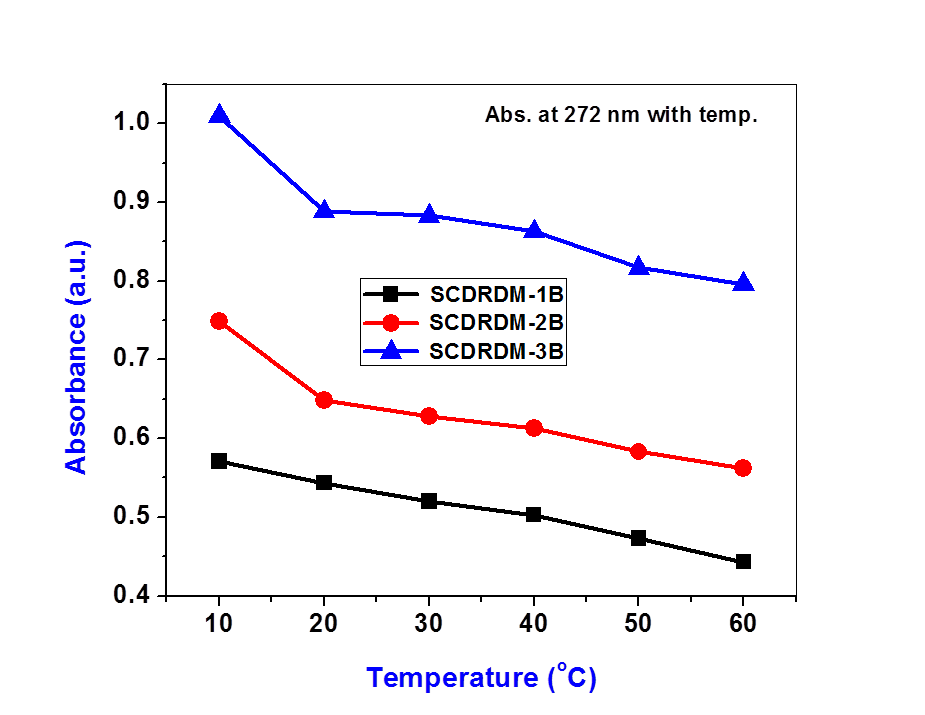
**

**Figure 4: Temperature versus electronic absorbance**

**
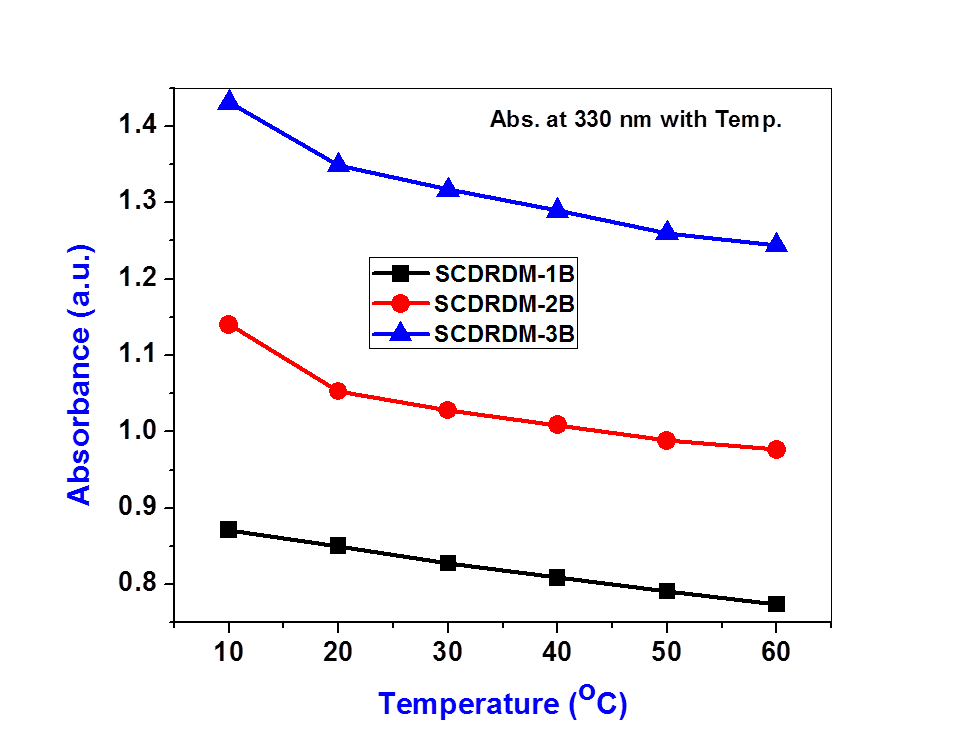
**

**Figure S 5: Temperature versus electronic absorption (at 330 nm due to Si-Si bond)**

#
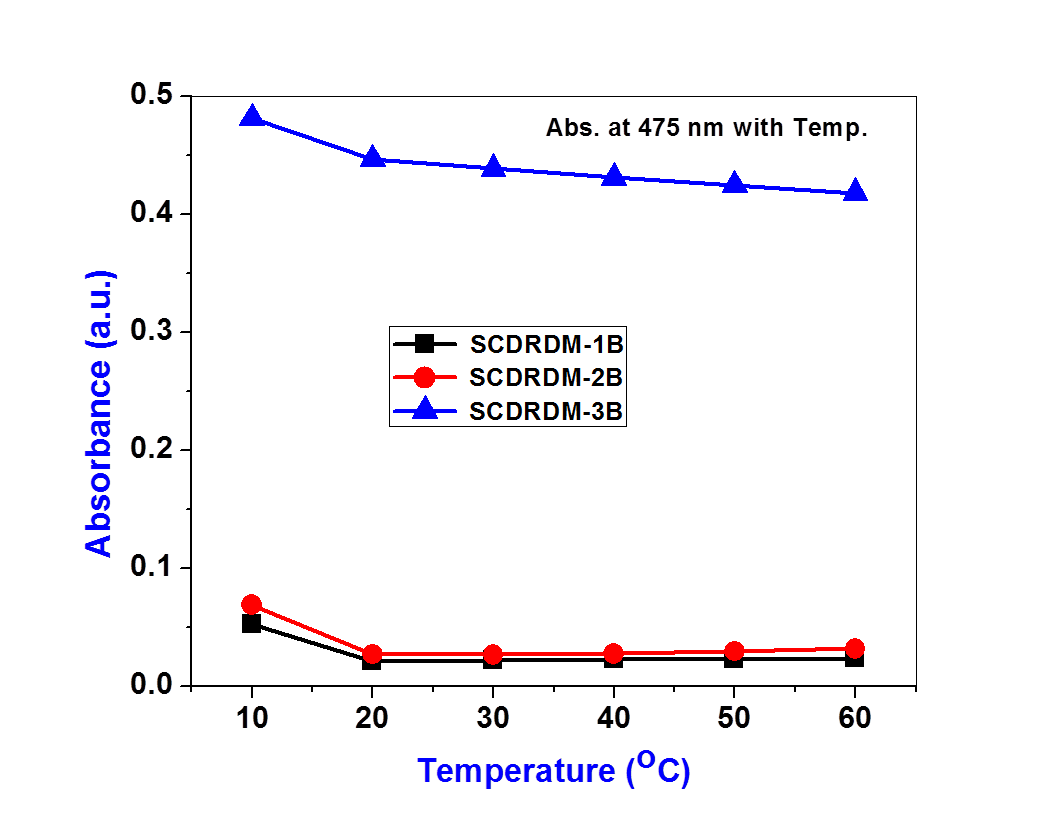


# Figure S 6: Temperature versus electronic absorption (at 475 nm due to –N=N- group)

***
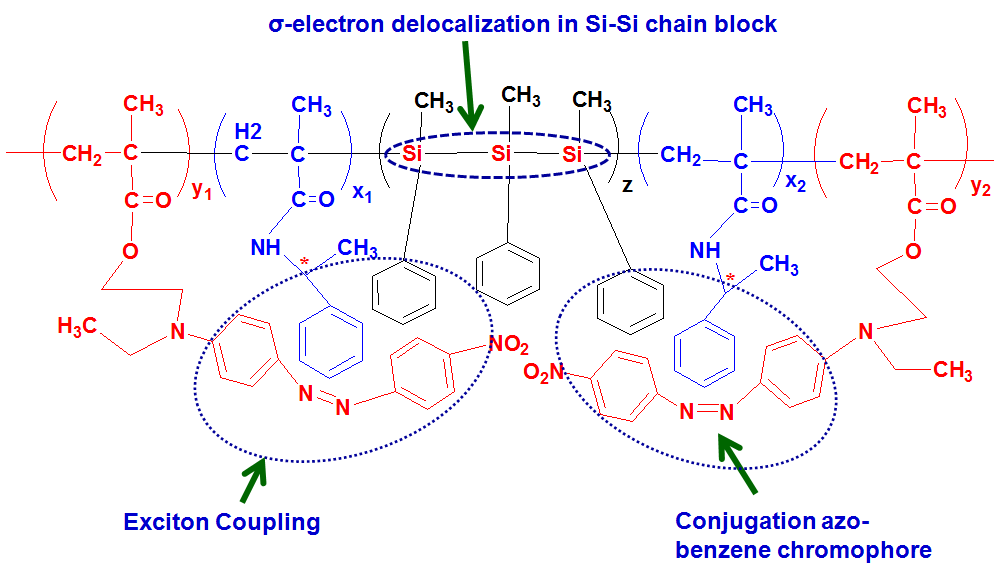
***

**Scheme S 1: Plausible interaction of functional moieties in synthesized functional polysilanes (SCDRDM)**
